# Supplementary material
Source: PubMed Central journal article supplement (PMC6937482)
Supplement: NIHMS1059862-supplement-supp.pdf [file NIHMS1059862-supplement-supp.pdf]

Supplementary Material for “Interfacial rheology and direct imaging reveal domain-templated network formation in phospholipid monolayers penetrated by fibrinogen”  
Ian Williams, Joseph A. Zasadzinski and Todd M. Squires

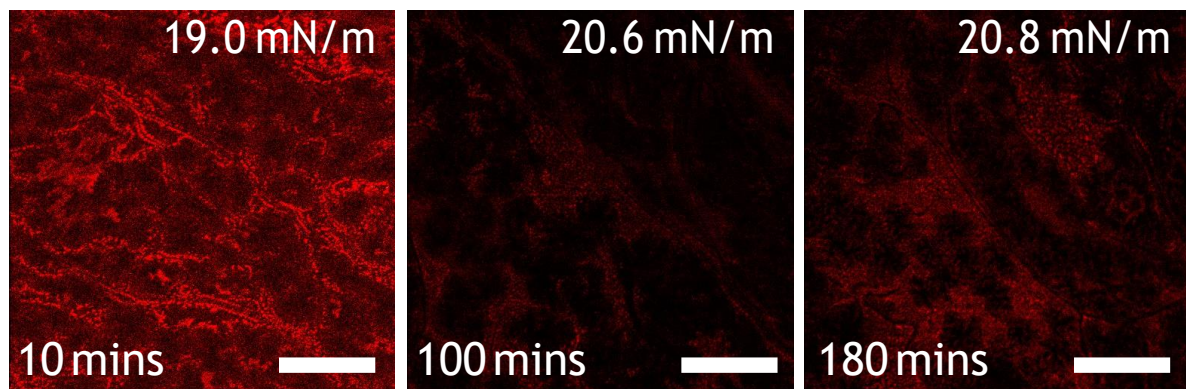

**Supplementary Figure S1.** Confocal micrographs of monolayer after fibrinogen solution is injected into the subphase beneath a DPPC monolayer at initial surface pressure  $\pi_i = 15 \text{ mN/m}$  showing labelled fibrinogen. Fibrinogen is injected at  $t = 0$ . Micrographs acquired 10 minutes, 100 minutes and 180 minutes after fibrinogen injection. Scale bar represents  $50 \mu\text{m}$ .
